# Supplementary material
Source: PubMed Central journal article supplement (PMC2843437)
Supplement: NIHMS167058-supplement-5.pdf [file NIHMS167058-supplement-5.pdf]

**Supplementary Table 1: Demographics and clinical details of trauma patient population.**

| Sex | Age | Mechanism of Injury           | Time to sample (min) | Head & Neck injuries                                                         | AIS Face injuries              | AIS Chest injuries                                                                                          | AIS Abdomen-Pelvic contents injuries | AIS Extremity -Pelvic girdle bony injuries              | AIS ISS           | Systolic BP (mmHg) | Serum buffer base Excess (U) |
|-----|-----|-------------------------------|----------------------|------------------------------------------------------------------------------|--------------------------------|-------------------------------------------------------------------------------------------------------------|--------------------------------------|---------------------------------------------------------|-------------------|--------------------|------------------------------|
| M   | 60  | Motor vehicle crash           | 128                  | Scalp hematoma                                                               | 1                              | 0 Multiple rib fractures, flail chest, hemo-pneumothorax                                                    | 4 Lumbar spine fracture              | 2 Pelvis and multiple arm fractures                     | 3 29              | 121                | -0.8                         |
| M   | 17  | Motorcycle crash              | 129                  | Intracranial hemorrhage. Cerebral edema. Multiple skull and facial fractures | 4 Multiple facial fractures.   | 2 Pneumothorax Pulmonary contusions                                                                         | 5                                    | 0 Wrist fracture, burn of calf                          | 2 45              | 117                | -8.2                         |
| M   | 41  | Fall on to concrete           | 83                   |                                                                              | 0                              | 0 T12 spine fracture, rib fractures, bilateral hemothoraces                                                 | 4                                    | 0 Pelvic and multiple upper & lower extremity fractures | 5 41              | 64                 | -3.6                         |
| M   | 31  | Pedestrian struck             | 76                   | Intracranial hemorrhage. Skull fracture                                      | 5                              | 0                                                                                                           | 0                                    | 0                                                       | 0 25              | 132                | -1.1                         |
| M   | 19  | Motor vehicle crash           | 94                   | Diffuse brain injuries (DAI)                                                 | 5 Facial fracture              | 2                                                                                                           | 0                                    | 0                                                       | 0 29              | 124                | 2.9                          |
| M   | 59  | Fall down stairs              | 89                   | Intracranial hemorrhage. Skull fracture.                                     | 4                              | 0 Bilateral pulmonary contusions. Rib fractures                                                             | 4                                    | 0 Fractured clavicle                                    | 2 36              | 128                | -6.6                         |
| M   | 39  | Fall down stairs              | 64                   | Intracranial hemorrhage. Skull fracture. Cerebral edema.                     | 5                              | 0 Pulmonary contusion. Rib fractures.                                                                       | 3                                    | 0                                                       | 0 34              | 142                | -0.8                         |
| M   | 51  | Pedestrian struck             | 93                   | Intracranial hemorrhage. Diffuse brain injury (DAI)                          | 4                              | 0 T6, T8 spine fractures                                                                                    | 3 Lumbar spine fracture              | 2 Multiple lower extremity fractures                    | 3 34              | 71                 | -10                          |
| M   | 16  | Motorcycle crash              | 87                   | Intracranial hemorrhage. Diffuse brain injury (DAI)                          | 5                              | 0                                                                                                           | 0                                    | 0                                                       | 0 25              | 104                | -1.2                         |
| M   | 27  | Motorcycle crash              | 142                  |                                                                              | 0 Multiple facial fractures    | 2 Multiple rib fractures, pulmonary contusions, hemopneumothorax, T3/4 spine fractures. Spinal cord injury. | 5                                    | 0 Fractured scapula                                     | 2 33              | 84                 | -1.9                         |
| F   | 75  | Pedestrian struck             | 75                   | Intracranial hemorrhage. Skull fracture.                                     | 4 Multiple facial fractures    | 0 Rib fractures, flail chest bilateral pneumo-thoraces and pulmonary contusions                             | 4 Lumbar spine fractures             | 2 Multiple pelvis and upper extremity fractures.        | 3 43              | 128                | -3.9                         |
| M   | 71  | Motor vehicle crash           | 111                  | Cervical spine fracture dislocations. Spinal cord injury.                    | 4                              | 0 Rib fractures                                                                                             | 1                                    | 0 Multiple upper extremity fractures                    | 3 26              | 93                 | -0.3                         |
| F   | 66  | Motor vehicle crash – ejected | 98                   |                                                                              | 0 Facial fracture              | 2 Rib fractures, pneumothorax                                                                               | 5                                    | 0 Fracture-dislocation left hip                         | 2 33              | 134                | 3.1                          |
| F   | 59  | Fall 4 floors                 | 92                   |                                                                              | 0                              | 0                                                                                                           | 0 Abdominal hemorrhage               | 0 Pelvic fracture and retroperitoneal hemorrhage        | 5 25 unmeasurable |                    | -8.7                         |
| M   | 17  | Motorcycle crash              | 120                  | Intracranial hemorrhage. Diffuse brain injury (DAI)                          | 5 Multiple face/ jaw fractures | 3 Pneumothorax, T6 spine fracture                                                                           | 3                                    | 0 Pelvis and lower extremity fractures                  | 2 43              | 144                | -3.1                         |

Trauma patients having serum mtDNA measurements (**Supplementary Figure 1**) had no significant medical co-morbidities, and no major open or intestinal injuries (study exclusions). Mean age was  $43 \pm 21$ SD (median 41) years. Mean sampling time was  $98 \pm 23$ SD (median 93) minutes. The AIS (Abbreviated Injury Score) was scored for each body region. Each injury or group of injuries is assigned 0-5 points. The ISS (Injury Severity Score) is the global sum of the three worst AIS scores squared (0-75 points). BP=blood pressure. Buffer base excess (calculated from arterial pH/pCO<sub>2</sub>) indicates tissue perfusion.

**Supplementary Table 2: Demographics of volunteer control blood donors**

| <b>Sex</b> | <b>Age</b> | <b>Trauma or injury at time of sample</b> | <b>Acute diseases</b> | <b>Chronic diseases</b> |
|------------|------------|-------------------------------------------|-----------------------|-------------------------|
| M          | 28         | None                                      | None                  | None                    |
| F          | 62         | None                                      | None                  | None                    |
| F          | 30         | None                                      | None                  | None                    |
| M          | 56         | None                                      | None                  | None                    |
| M          | 54         | None                                      | None                  | Type II Diabetes        |
| F          | 37         | None                                      | None                  | None                    |
| M          | 61         | None                                      | None                  | Type II Diabetes        |
| M          | 32         | None                                      | None                  | None                    |
| F          | 38         | None                                      | None                  | None                    |
| M          | 33         | None                                      | None                  | None                    |
| F          | 34         | None                                      | None                  | None                    |
| M          | 26         | None                                      | None                  | None                    |

Clinical data is presented for volunteer blood donors with serum mtDNA measurements shown in Supplementary Fig. 1. No patient had an acute injury. Two subjects had chronic uncomplicated type II diabetes. Mean age was  $41 \pm 14$ SD (median 36) years.

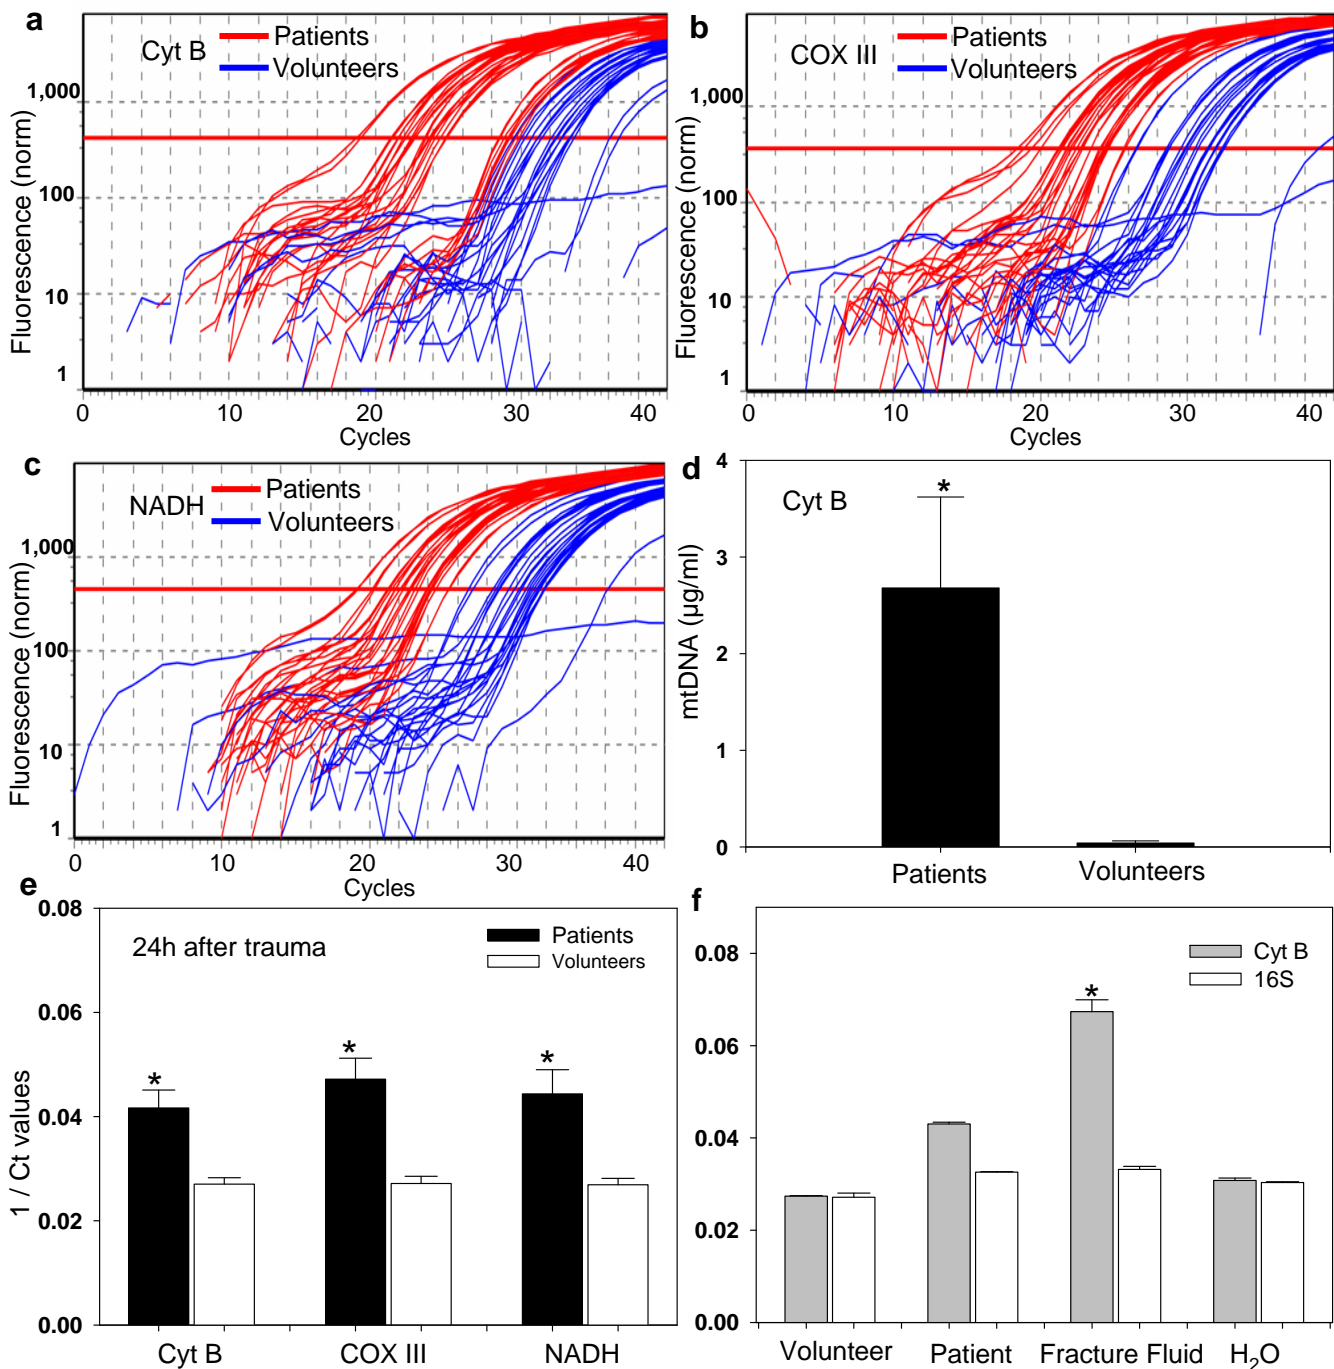

### Supplementary Figure 1: Clinical trauma results in circulation of mtDNA.

qPCR traces show that mtDNA is released in high concentration by injury (a-c). Absolute Cyt B concentration is shown (d) in patients and volunteers (n=12, \*p<0.05, t-test). mtDNA was sampled (e) in patient plasma 24h post-injury (n≥10, \*p<0.01, t-test). 1/Ct denotes the reciprocal of the count where the sequence is detected: a direct function of concentration. mtDNA was assayed in supernatants of reaming fluids (f) from clinical fracture repairs (n≥10, \*p<0.01, ANOVA/Dunn). qPCR for bacterial 16S rRNA showed no bacterial contamination of any specimen.

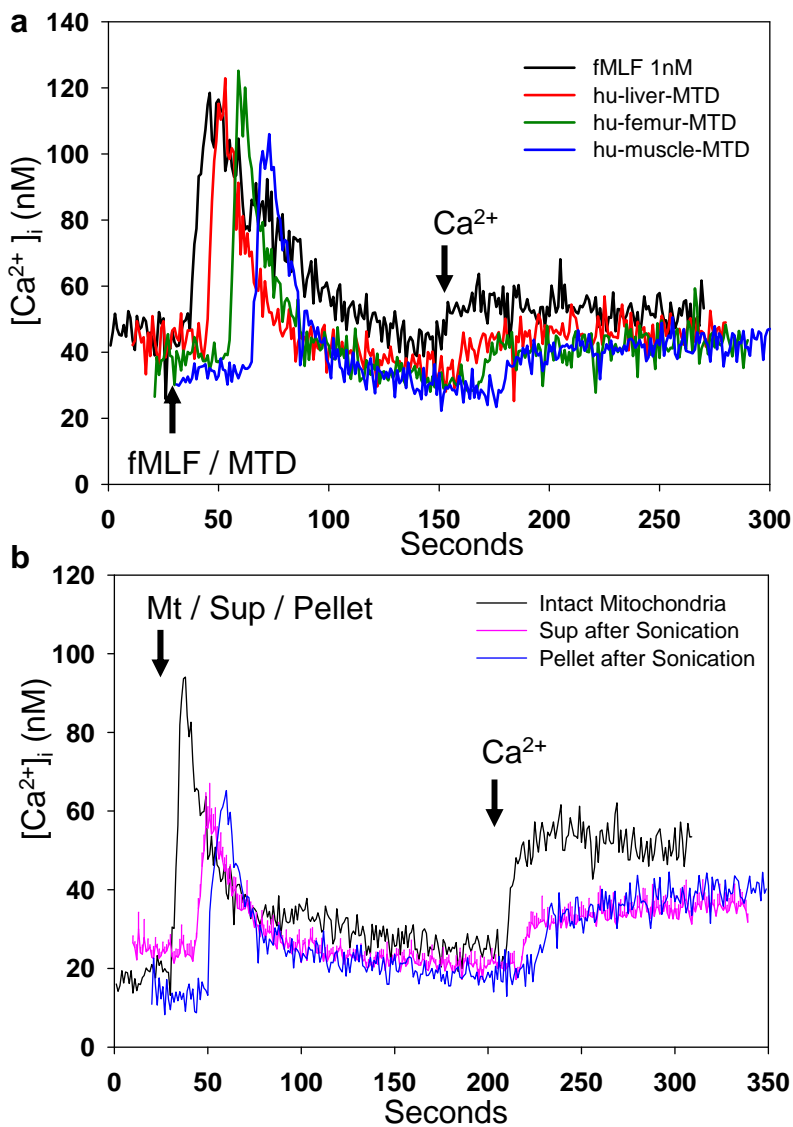

**Supplementary Figure 2: Potency of MTD from differing sources**

**a.** MTD derived from human liver, human femur fractures, and human skeletal muscle produce similar PMN calcium fluxes at the same dilutions, approximating the response to 1nM fMLF at ~1/100 dilution. **b.** The calcium response to intact mitochondria is approximately the sum of responses to the supernatants and pellets produced by sonication and centrifugation of mitochondria. All traces are the means of 3 experiments. Some traces are displaced for ease of viewing.

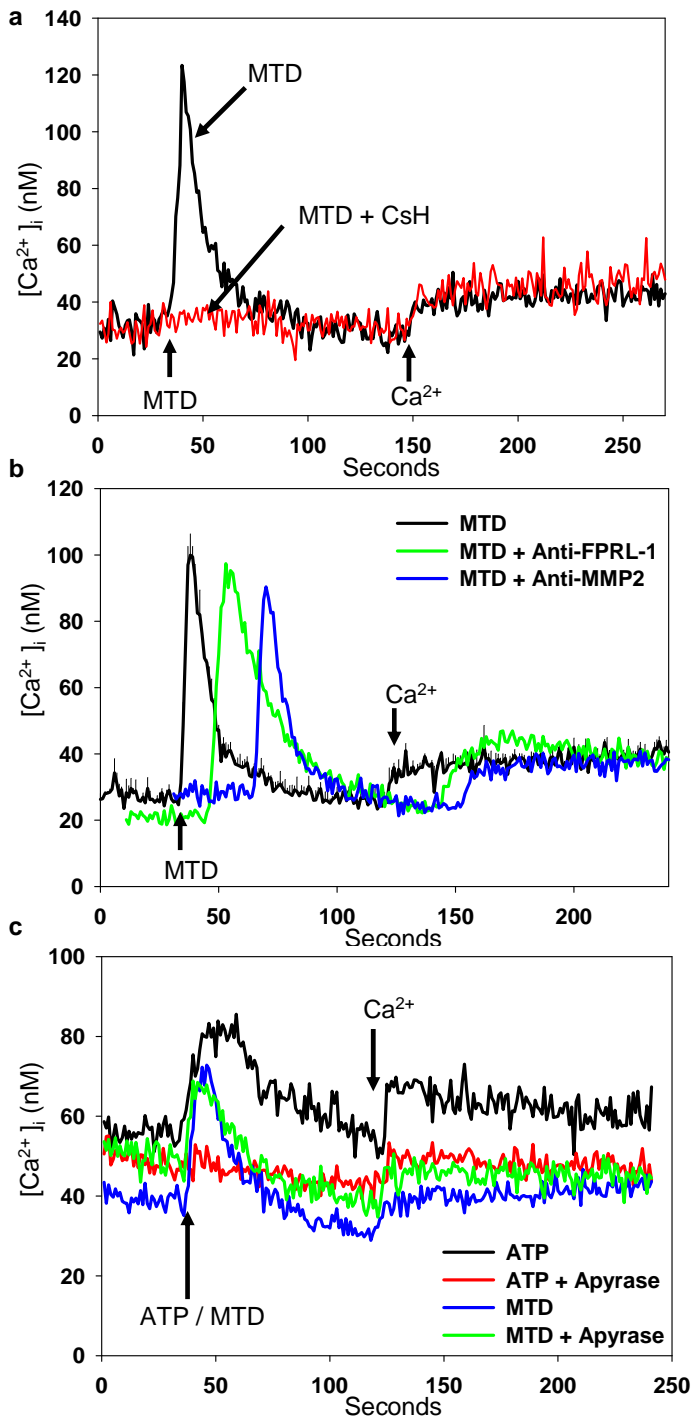

### Supplementary Figure 3: MTD mobilizes $[Ca^{2+}]_i$

CsH specifically inhibits FPR-induced human PMN calcium depletion (a), and isotype control antibodies for that experiment (anti-FPRL-1, anti-MMP-2) have no effect on PMN responses to MTD (b). 1mM ATP mobilizes PMN  $[Ca^{2+}]_i$  (c, black trace). Treatment of ATP with apyrase destroys ATP (c, red trace) and aborts  $Ca^{2+}$  signaling. MTD causes  $[Ca^{2+}]_i$  signaling (c, blue trace) that is resistant to apyrase (c, green trace) showing MTD  $Ca^{2+}$  signaling is not due to ATP. Representative traces, displaced for ease of viewing.

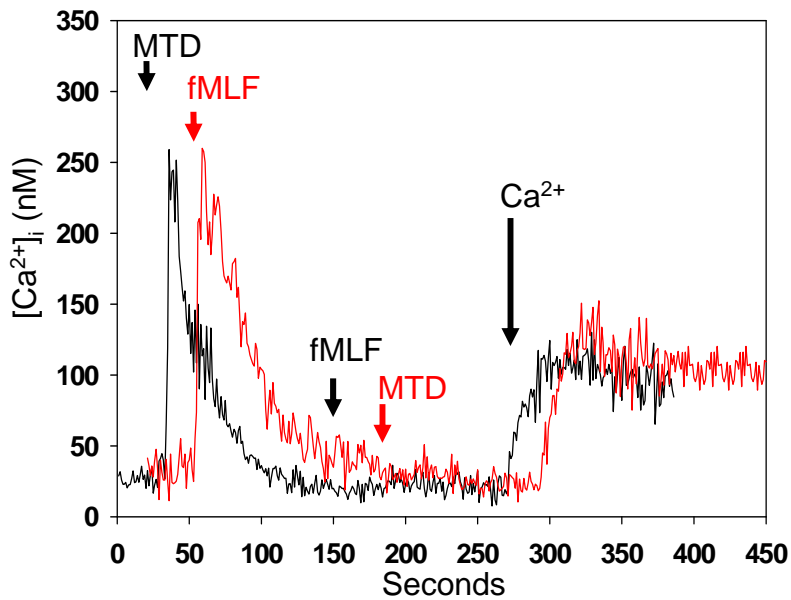

**Supplementary Figure 4: MTD homologous desensitization**

PMN treated with sequentially applied MTD-fMLF (black trace) or fMLF-MTD (red trace) showed completely inhibited  $Ca^{2+}$  responses to the second stimuli. All traces are means of 4 experiments, displaced for ease of viewing.

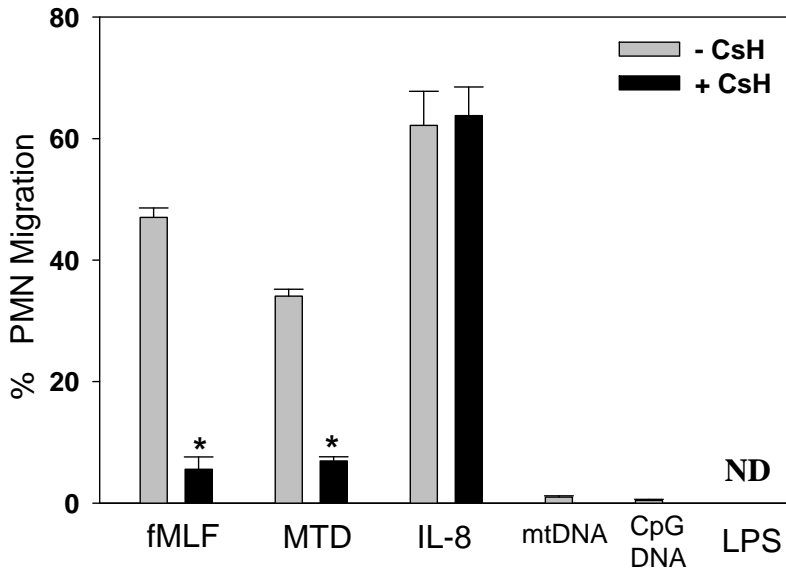

**Supplementary Figure 5: PMN chemotaxis in transwell assay.**

PMN show brisk chemotaxis to fMLF (10nM), MTD (100 $\mu$ g/ml) and IL-8 (10nM). CsH (1 $\mu$ M) significantly inhibits PMN migration to fMLF and MTD, but not to IL-8. PMNs show no primary chemotactic responses at all to the TLR agonists mtDNA (10 $\mu$ g/ml), CpG-DNA (10 $\mu$ g/ml), and LPS (1  $\mu$ g/ml). n=3,\*p<0.05 (*t*-test).

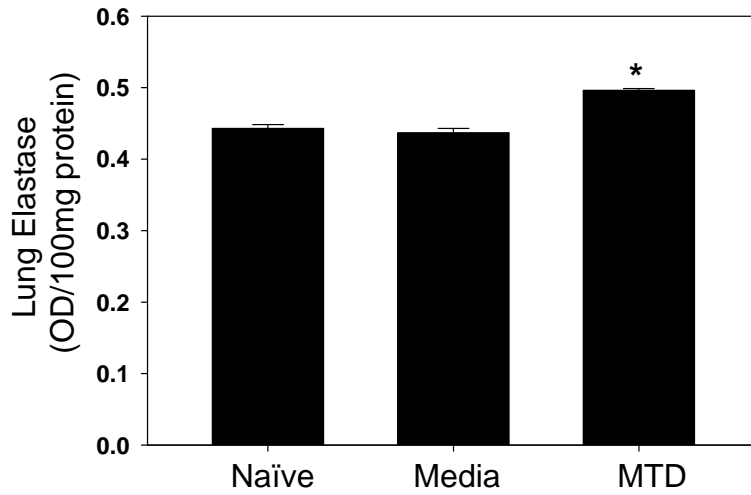

**Supplementary Figure 6: PMN elastase in rat lung**

Rats injected with MTD showed increased elastase levels in whole lung homogenates. (n≥3 for each group of rats, \*p<0.05, ANOVA/Holm-Sidak).



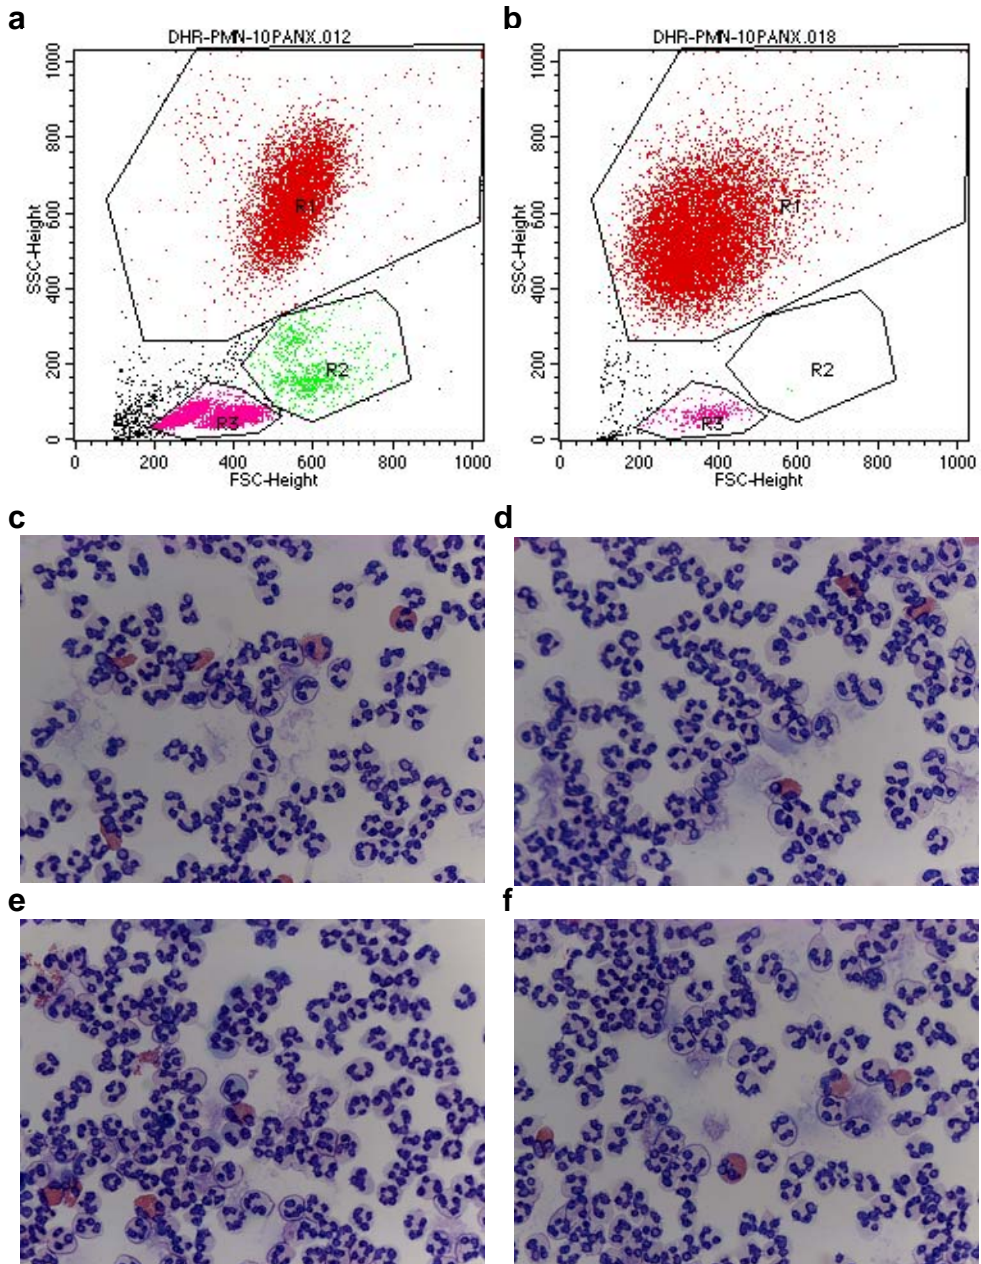

### Supplementary Figure 7: PMN purity

PMN purity was confirmed by flow cytometry. Representative forward and side scatter dot plots show neutrophils in red (R1) and monocytes in green (R2). Whole blood with RBC lysis (a), R1= 53.2% and R2= 6.28%. PMN isolated from whole blood with RBC lysis (b), R1= 95.24% and R2= 0.02%. PMN purity was then confirmed by cytospin with HEMA-3 stain and visual inspection. Four random fields are displayed (c-f). Monocytes are absent.
